# Supplementary material for: De novo assembly and annotation of Asiatic lion (Panthera leo persica) genome
Source: bioRxiv or medRxiv preprint supplement (doi:10.1101/549790), 2019-02-14
Supplement: Supplementary file [file media-2.pdf]

## Supplementary Information

### **De novo assembly and annotation of Asiatic lion (*Panthera leo persica*) genome**

Siuli Mitra<sup>1,2</sup>, Ara Sreenivas<sup>1</sup>, Divya Tej Sowpati<sup>3</sup>, Amitha Sampat Kumar<sup>3</sup>, Gowri Awasthi<sup>4,5</sup>, M. Milner Kumar<sup>4,6</sup>, Wajeeda Tabusum<sup>1</sup>, **Ajay Gaur<sup>1\*</sup>**

1. Laboratory for Conservation of Endangered Species (LaCONES), CSIR-Centre for Cellular and Molecular Biology, Attapur, Hyderabad, India 500048
2. Present address Translational Health Science and Technology Institute (THSTI), Faridabad, India 121001
3. Genome Organisation and Nuclear Architecture Lab, CSIR-Centre for Cellular and Molecular Biology, Uppal Road, Hyderabad, India 500007
4. Past address: SciGenome Labs, Kochi, India 682037
5. Present address: Yashraj Biotechnology Ltd. Navi Mumbai, India 400705
6. Present address: Indian Institute of Technology, Madras, Chennai, India 600036

**\* Corresponding Author (agaur@ccmb.res.in)**

- **Supplementary Figures**

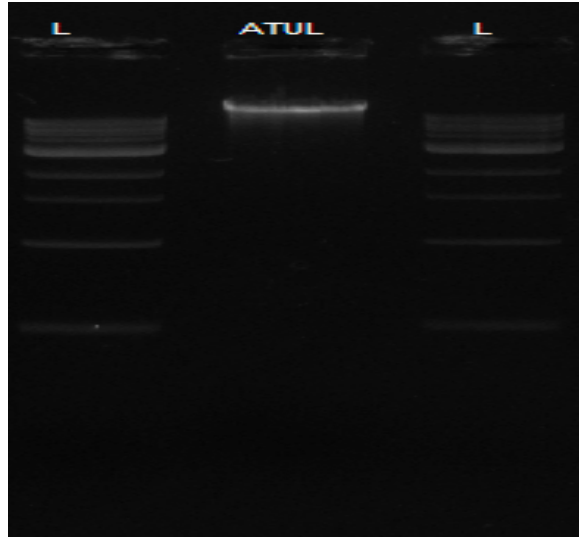

**Supplementary Figure L1: Agarose gel image of the genomic DNA isolated from Atul**

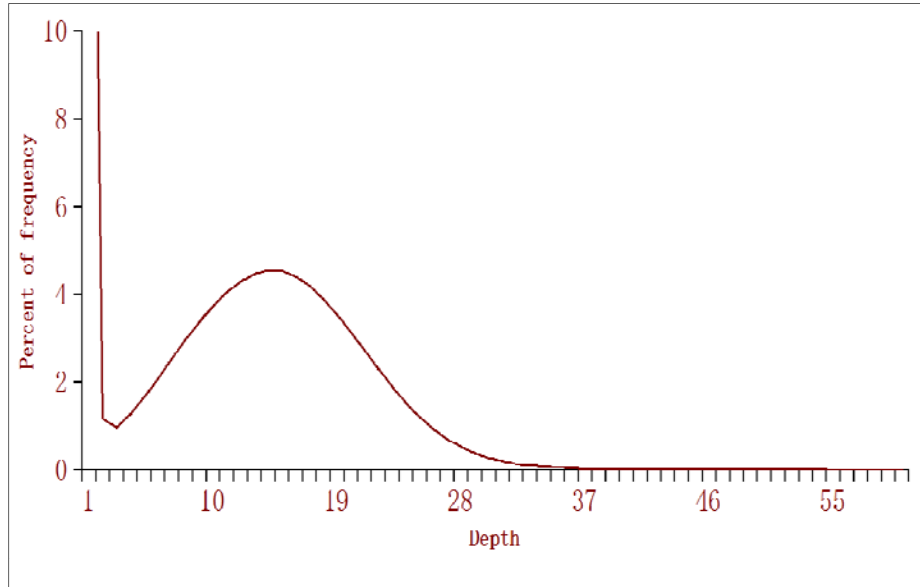

**Supplementary Figure L2: De Bruijn graph for genome size estimation using 23-mers**

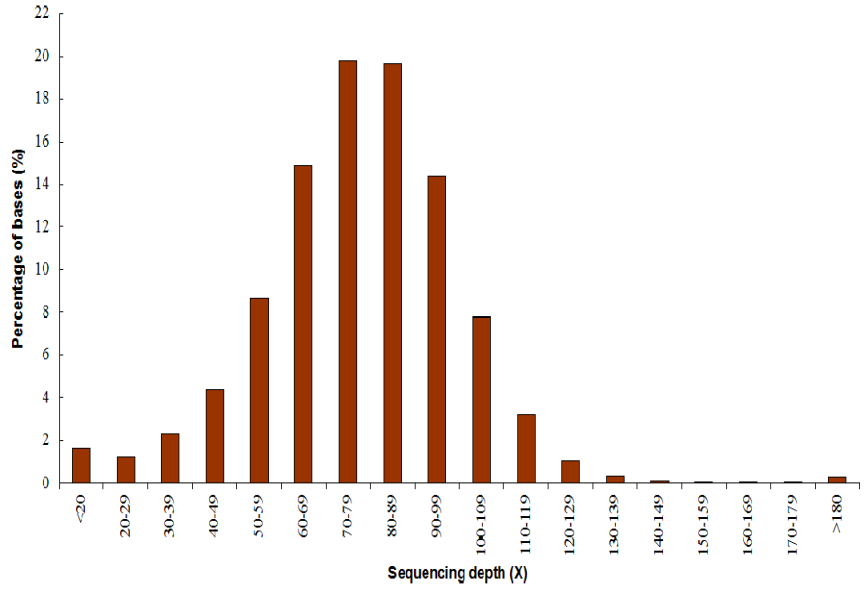

**Supplementary Figure L3: (A) Sequencing depth distribution**

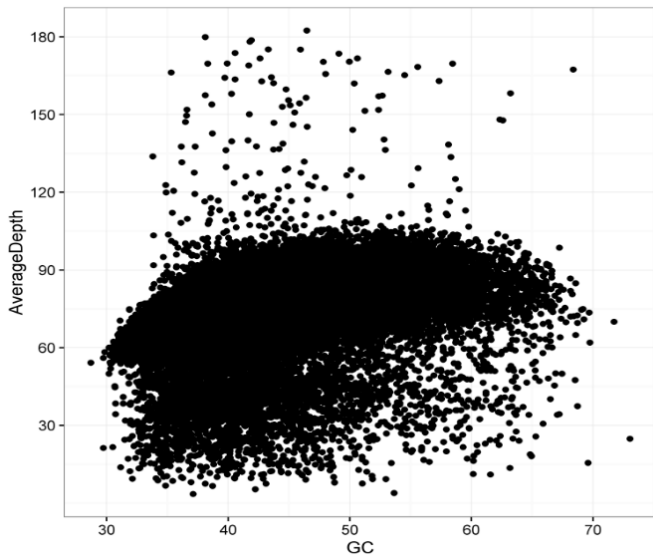

**Supplementary Figure L3 (B) GC contents and sequencing depths**

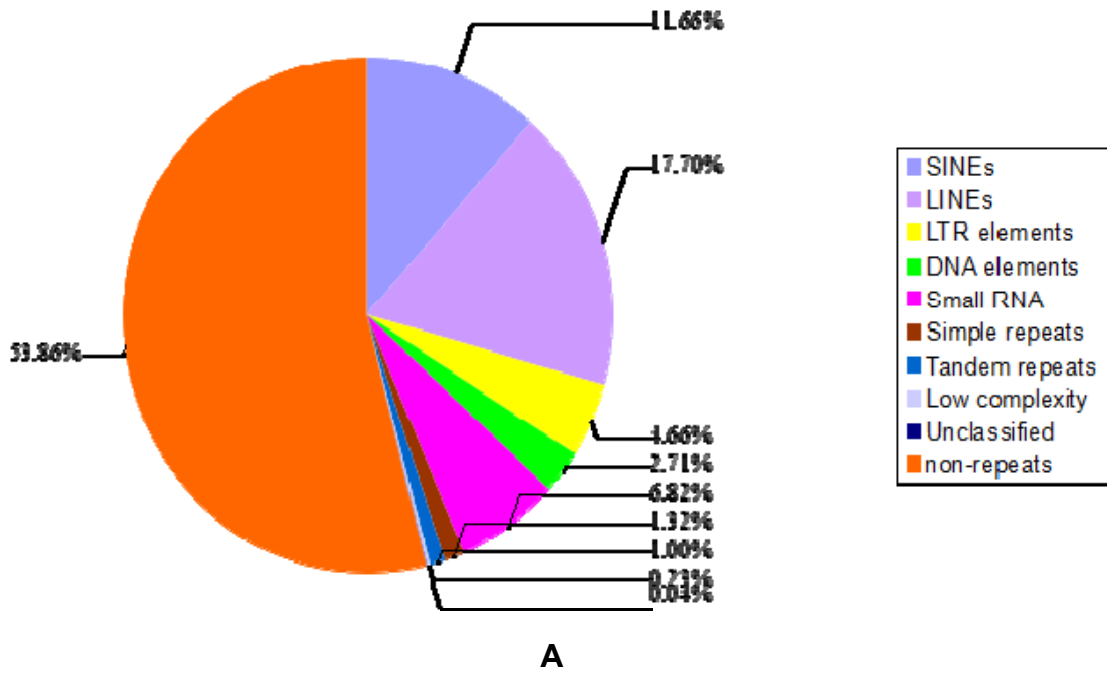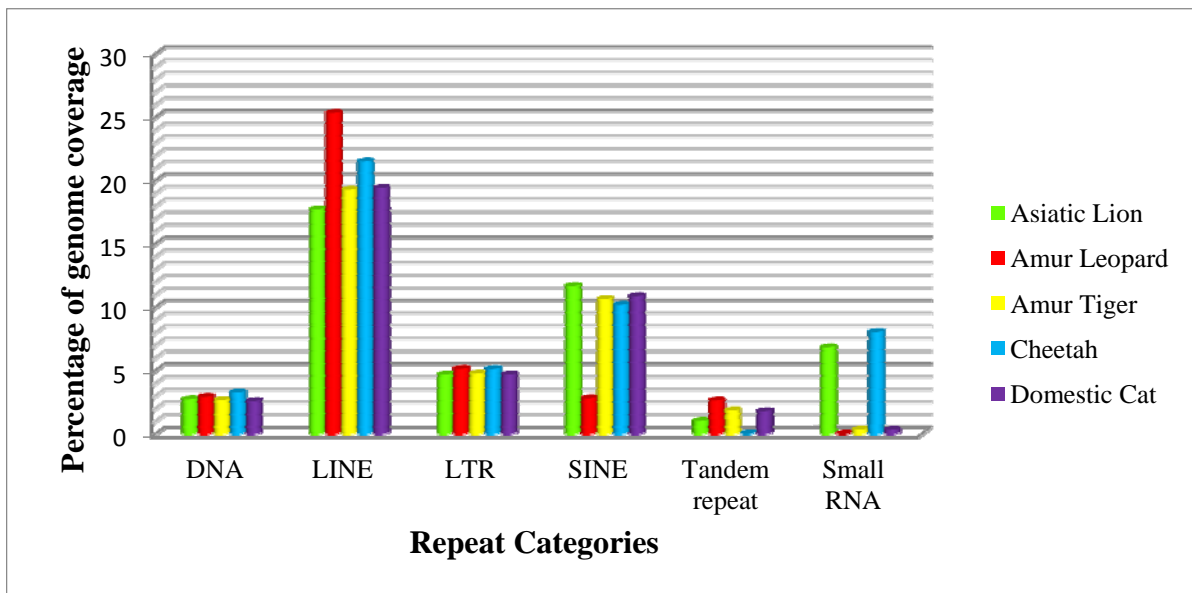

Supplementary Figure L4: (A) Distribution of repeats in the Asiatic lion genome and (B) Comparison of repeats' distribution among Felidae genomes

|              | miRNA                                                                             | tRNA                                                                              | 5S rRNA                                                                           | 5.8S rRNA                                                                         | 28S rRNA                                                                           | 18S rRNA                                                                            | snRNA                                                                               |
|--------------|-----------------------------------------------------------------------------------|-----------------------------------------------------------------------------------|-----------------------------------------------------------------------------------|-----------------------------------------------------------------------------------|------------------------------------------------------------------------------------|-------------------------------------------------------------------------------------|-------------------------------------------------------------------------------------|
| Asiatic lion |  |  |  |  |  |  |  |
| Amur tiger   |  |  |  |  |  |  |  |

**Figure L5: Comparison of non-coding RNA with Amur tiger**

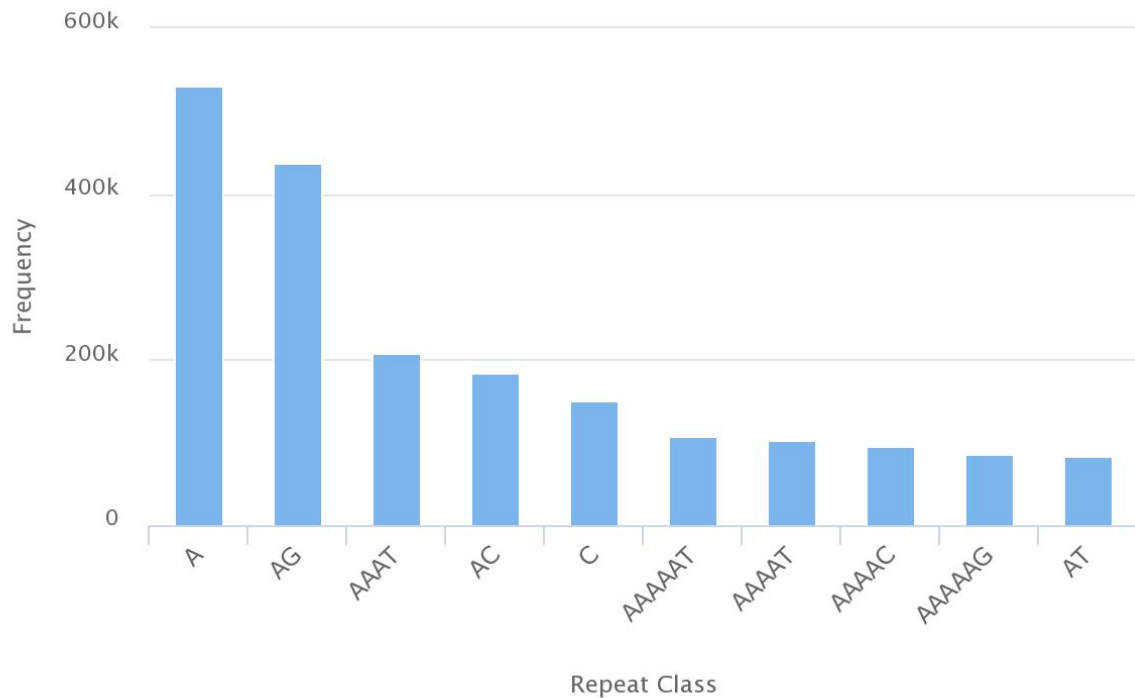

**A**

Highcharts.com

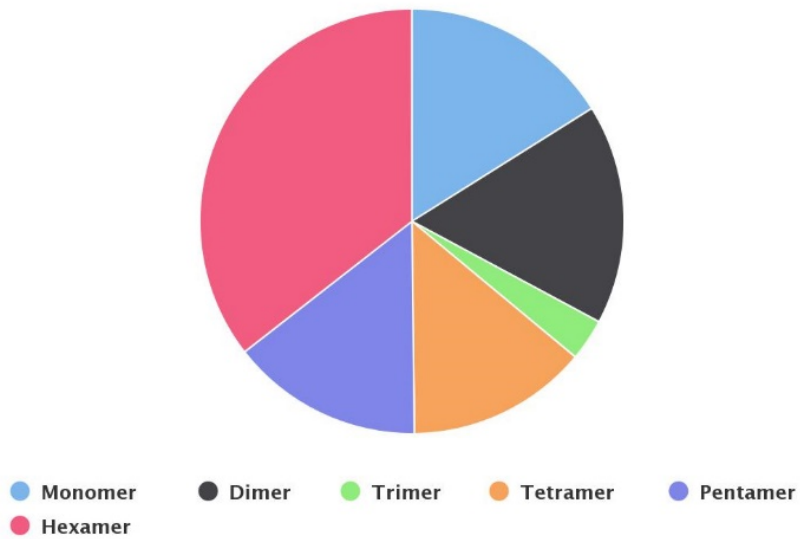

Highcharts.com

**Supplementary Figure L6: (A) Distribution of SSR repeats frequency in the Asiatic lion genome and (B) Distribution of SSRs**

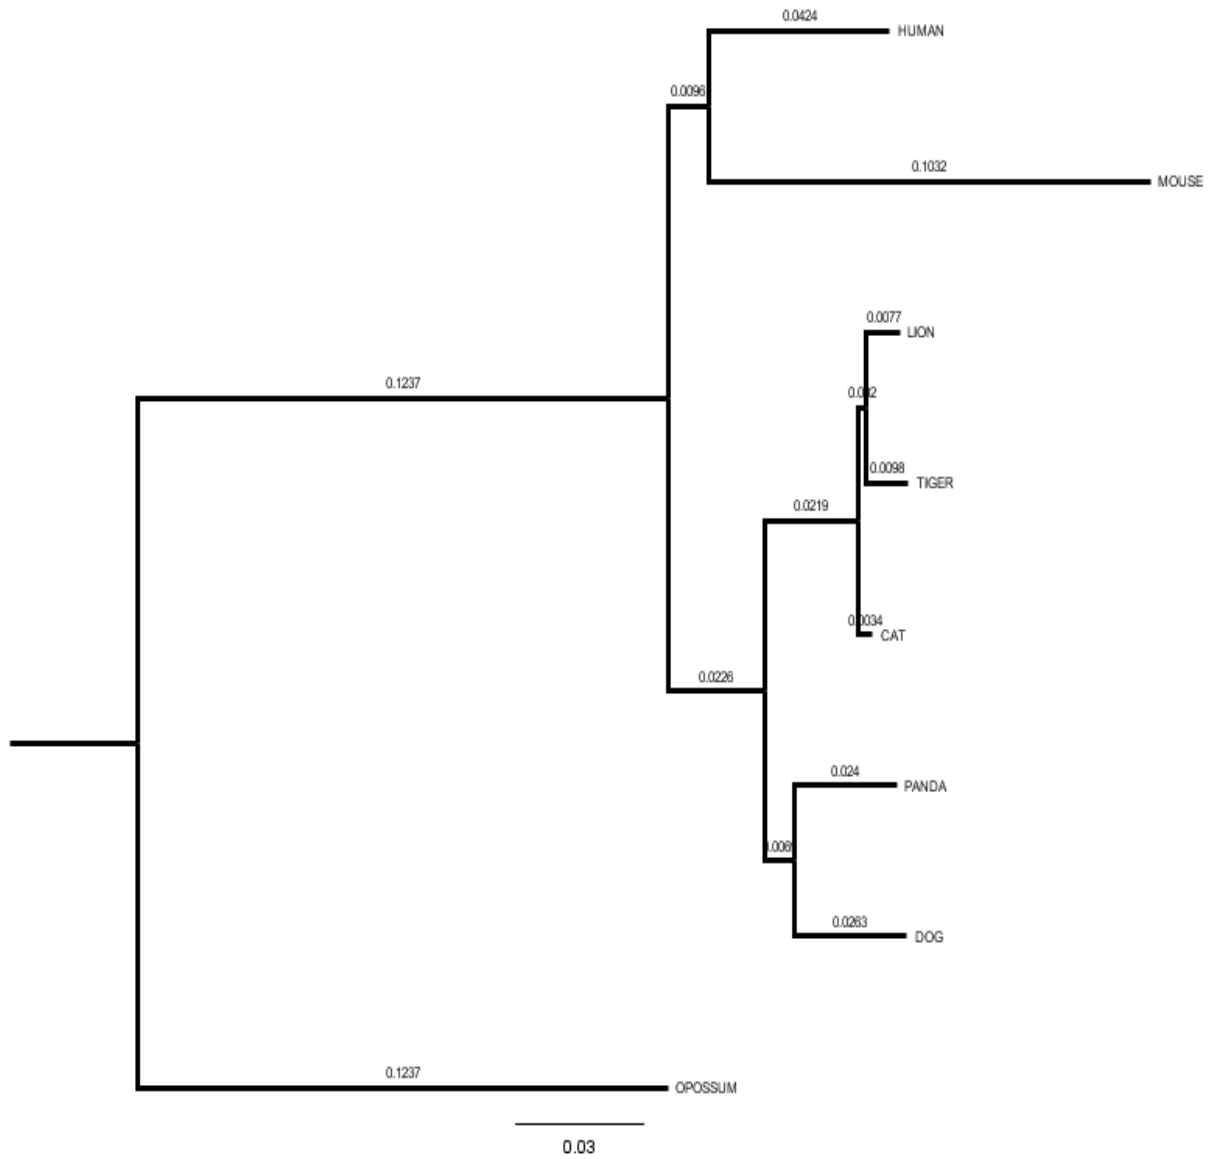

**Supplementary Figure L7: Maximum likelihood (ML) tree depicting the position of Asiatic lion in the mammalian phylogeny**



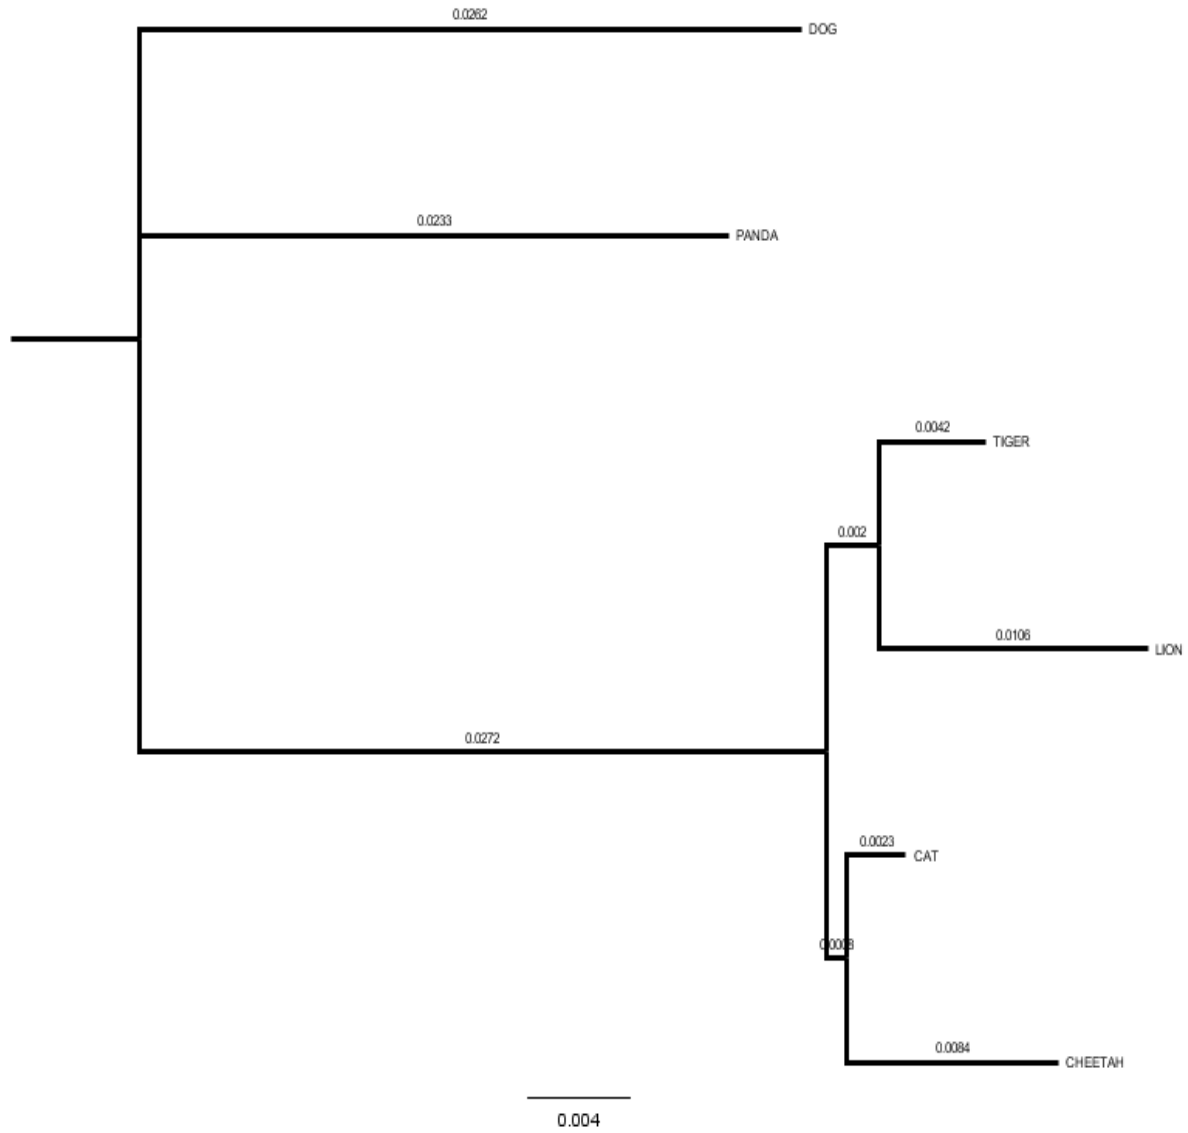

**Supplementary Figure L8: Maximum likelihood (ML) tree depicting the position of Asiatic lion in Carnivora phylogeny.**

## Supplementary Figure L9: Functional classification of positively selected genes in Asiatic lion into Biological Processes, Cellular Components and Molecular Functions

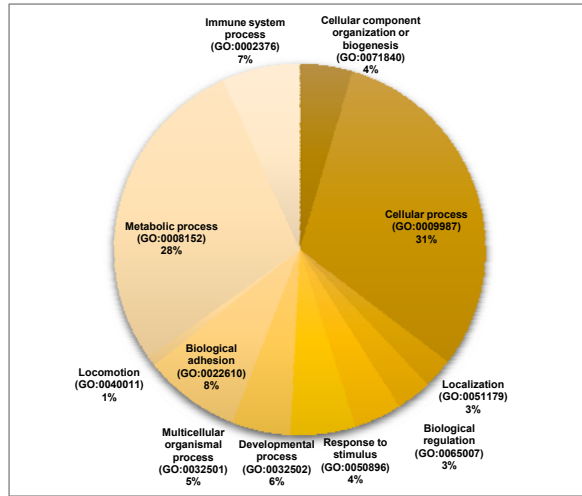

**Biological Processes**

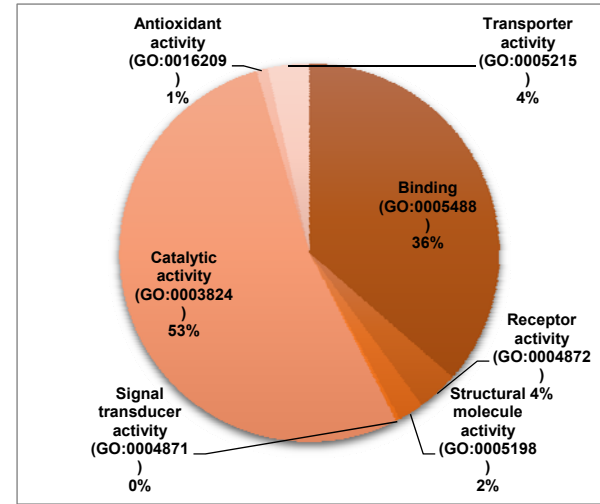

**Molecular Function**

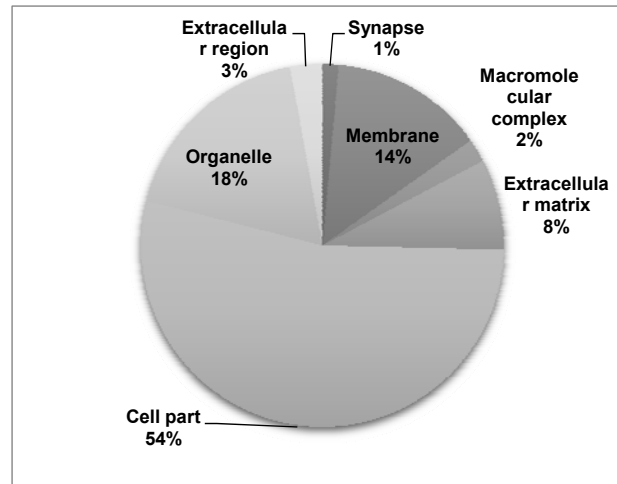

**Cellular components**

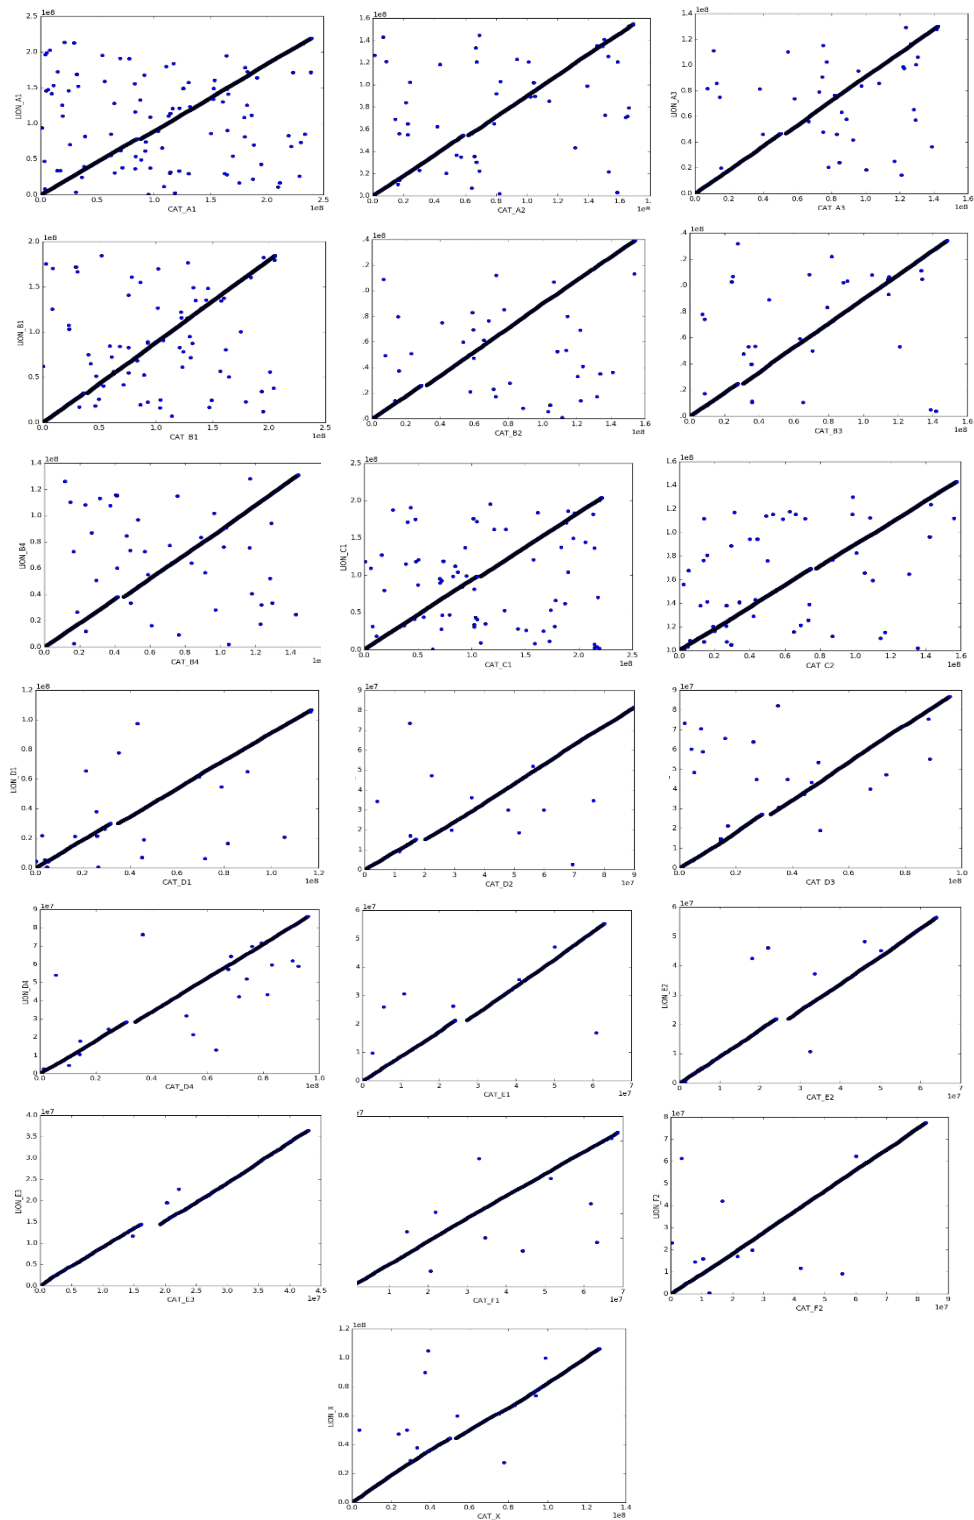

**Supplementary Figure L10: Dot plots or MUMs showing intra-chromosomal rearrangements with a block length cut off 5kb between Asiatic lion and domestic cat chromosomes. The x-axis represents the domestic cat genome (reference sequence) and the y-axis stands for the lion genome (query sequence). The line of blue dots shows exact conservation between two chromosomes. A disruption in this continuity is indicative of a rearrangement.**

## Supplementary Tables

**Supplementary Table S1: Details of the blood sample used for sequencing**

| <b>Sample</b> | <b>Name</b>                                    | <b>Sex</b> | <b>Place of Collection</b>          |
|---------------|------------------------------------------------|------------|-------------------------------------|
| Blood         | <b>Atul</b><br>(National Stud Book No. 455)    | Male       | Nehru Zoological Park,<br>Hyderabad |
| Blood         | <b>Ajay</b><br>(National Stud Book No. 477)    | Male       | Nehru Zoological Park,<br>Hyderabad |
| Blood         | <b>Rita</b><br>(National Stud Book No. 454)    | Female     | Nehru Zoological Park,<br>Hyderabad |
| Blood         | <b>Soniya</b><br>(National Stud Book No. 572)  | Female     | Nehru Zoological Park,<br>Hyderabad |
| Blood         | <b>Vishwas</b><br>(National Stud Book No. 638) | Male       | Nehru Zoological Park,<br>Hyderabad |

**Supplementary Table S2: Quantification results of the extracted genomic DNA from blood sample of Atul**

| <b>Sample Name</b> | <b>Qubit Reading<br/>conc. (ng/μl)</b> | <b>Nanodrop<br/>conc. (ng/μl)</b> | <b>260/280 ratio</b> |
|--------------------|----------------------------------------|-----------------------------------|----------------------|
| Atul               | 161                                    | 318.9                             | 1.8                  |

**Supplementary Table S3: Description of the six pair-end and mate-pair libraries used for Asiatic lion genome assembly**

| <b>Paired-end Libraries</b> | <b>Insert Size</b> | <b>Total Data (GB)</b> | <b>Average Read Length (bp)</b> | <b>Sequence Coverage(X)</b> |
|-----------------------------|--------------------|------------------------|---------------------------------|-----------------------------|
| Illumina Reads              | 150bp              | 55                     | 100                             | 22                          |
|                             | 500bp              | 42                     | 100                             | 17                          |
|                             | 800bp              | 24                     | 100                             | 10                          |
|                             | 4-6Kb              | 29                     | 250                             | 10                          |
|                             | 6-10Kb             | 25                     | 250                             | 8                           |
|                             | 1-20Kb             | 56                     | 250                             | 23                          |
| <b>Total</b>                |                    | <b>231</b>             |                                 | <b>90</b>                   |

**Supplementary Table S4: Information on the filtered sequence obtained**

| <b>Paired-end libraries</b> | <b>Insert Size</b> | <b>Total Data(GB)</b> | <b>Average Read Length (bp)</b> | <b>Sequence Coverage(X)</b> |
|-----------------------------|--------------------|-----------------------|---------------------------------|-----------------------------|
| Illumina Reads              | 150bp              | 48                    | 100                             | 20                          |
|                             | 500bp              | 35                    | 100                             | 14                          |
|                             | 800bp              | 18                    | 100                             | 7                           |
|                             | 4-6Kb              | 12                    | 250                             | 5                           |
|                             | 6-10Kb             | 12                    | 250                             | 5                           |
|                             | 1-20Kb             | 27                    | 250                             | 11                          |
| <b>Total</b>                |                    | <b>152</b>            |                                 | <b>62</b>                   |

**Supplementary Table S5: Genome sizes obtained by using K-mer values 17, 21 and 23**

| <b>K</b> | <b>Genome size (in bp)</b> |
|----------|----------------------------|
| 17       | 1,240,073,836              |
| 21       | 1,951,822,091              |
| 23       | 2,033,113,726              |



**Supplementary Table S6: Statistics for checking assembly quality**

|                                 | <b>Size (bp)</b> | <b>Contig Number</b> | <b>Size (bp)</b> | <b>Scaffold Number</b> |
|---------------------------------|------------------|----------------------|------------------|------------------------|
| <b>N90</b>                      | 2,900            | 223,929              | 14,580           | 63,620                 |
| <b>N80</b>                      | 4,700            | 163,455              | 19,315           | 48,654                 |
| <b>N70</b>                      | 6,620            | 118,529              | 24,685           | 37,308                 |
| <b>N60</b>                      | 8,545            | 87,453               | 30,300           | 28,308                 |
| <b>N50</b>                      | 10,669           | 62,599               | 36,647           | 20,864                 |
| <b>Longest</b>                  | 143,273          | -                    | 383,982          | -                      |
| <b>Total Size</b>               | 2,365,521,145    | -                    | 2,461,536,221    | -                      |
| <b>Total Number(&gt;1000bp)</b> | 2,316,348,500    | 323,968              | 2,452,616,604    | 94,372                 |
| <b>Total Number(&gt;5Kb)</b>    | 1,866,770,627    | 155,481              | 2,427,573,497    | 83,167                 |

**Supplementary Table S7: Asiatic lion blood transcriptomes statistics**

| <b>Individual's Name</b> | <b>Number of total reads</b> | <b>Total nucleotides (nt)</b> | <b>&gt; Q20 (%)</b> | <b>N base (%)</b> | <b>GC contents (%)</b> |
|--------------------------|------------------------------|-------------------------------|---------------------|-------------------|------------------------|
| Ajay                     | 87,178,978                   | 17,435,795,600                | 91.04               | 0.0768            | 48.42                  |
| Atul                     | 51,348,948                   | 10,269,789,600                | 88.74               | 0.0514            | 51.38                  |
| Rita                     | 48,860,522                   | 9,772,104,400                 | 90.36               | 0.0717            | 45.56                  |
| Sonia                    | 60,782,750                   | 12,156,550,000                | 86.69               | 0.0732            | 51.72                  |
| Viswas                   | 98,594,244                   | 19,718,848,800                | 89.96               | 0.0870            | 49.12                  |

**Supplementary Table S8: Gene coverage evaluation from assembled Asiatic lion transcripts**

| Data set | Number    | Total Length (bp) | Covered by Assembly | With >90% sequence in one scaffold |             | With >50% sequence in one scaffold |             |
|----------|-----------|-------------------|---------------------|------------------------------------|-------------|------------------------------------|-------------|
|          |           |                   |                     | Number                             | Percent (%) | Number                             | Percent (%) |
| All      | 1,519,892 | 787,784,760       | 81.78               | 901,883                            | 59.33       | 1,304,378                          | 85.82       |
| >200     | 1,519,892 | 787,784,760       | 81.78               | 901,883                            | 59.33       | 1,304,378                          | 85.82       |
| >500     | 373,840   | 447,253,979       | 81.33               | 201,352                            | 53.86       | 323,994                            | 86.66       |
| >1000    | 142,537   | 290,521,816       | 81.86               | 73,674                             | 51.68       | 127,114                            | 89.17       |

**Supplementary Table S9: Gene coverage evaluation from assembled Asiatic lion transcripts**

| Total EST | Mapped EST | Mapped Percent (%) | EST s Covered by Assembly (%) | >90% mapped in one scaffold |         | >50% mapped in one scaffold |         | >20% mapped in one scaffold |         |
|-----------|------------|--------------------|-------------------------------|-----------------------------|---------|-----------------------------|---------|-----------------------------|---------|
|           |            |                    |                               | Number                      | Percent | Number                      | Percent | Number                      | Percent |
| 919       | 888        | 96.63              | 86.86                         | 630                         | 68.55   | 820                         | 89.23   | 865                         | 94.12   |

**Supplementary Table S10: Evolution of the completeness of the Asiatic lion genome assembly using (CEGMA) approach.**

| <b>Parameter</b>       | <b>Number</b> | <b>Percent (%)</b> |
|------------------------|---------------|--------------------|
| Total KOGs             | 458           |                    |
| ONE KOG align one gene | 391           | 86.89              |
| ONE KOG align no gene  | 67            | 14.62              |

**Supplementary Table S11: Comparison of Asiatic lion and domestic cat genomes (Felis\_catus-8.0) showing number of chromosomes, base composition and GC content.**

|                              | <b>Lion</b>   |                   | <b>Domestic cat</b> |                   |
|------------------------------|---------------|-------------------|---------------------|-------------------|
| <b>Number of chromosomes</b> | 19            |                   | 19                  |                   |
| <b>Total bases</b>           | 2,119,661,238 |                   | 2,428,540,393       |                   |
| <b>Base</b>                  | <b>Number</b> | <b>Percentage</b> | <b>Number</b>       | <b>Percentage</b> |
| <b>A</b>                     | 589,629,285   | 27.82             | 681,725,917         | 28.07             |
| <b>T</b>                     | 590,066,774   | 27.84             | 682,210,425         | 28.09             |
| <b>G</b>                     | 420,116,318   | 19.82             | 487,148,479         | 20.06             |
| <b>C</b>                     | 419,941,851   | 19.81             | 486,985,203         | 20.05             |
| <b>N</b>                     | 99,907,010    | 4.71              | 90,470,369          | 3.73              |
| <b>GC Content (%)</b>        | 39.63%        |                   | 41.66%              |                   |

**Supplementary Table S12: Statistical figures obtained by mapping Asiatic lion raw reads to the domestic cat genome (*Felis\_catus*-8.0)**

|       | <b>Total bases (except N)</b> | <b>No depth filter</b> | <b>≥ 5 Depth</b> | <b>Coverage (no depth filter)</b> | <b>Coverage (up to 5 depth)</b> |
|-------|-------------------------------|------------------------|------------------|-----------------------------------|---------------------------------|
| ChrA1 | 239,302,903                   | 230,898,223            | 229,240,912      | 0.9649                            | 0.9580                          |
| ChrA2 | 169,043,629                   | 161,904,742            | 160,691,623      | 0.9578                            | 0.9506                          |
| ChrA3 | 142,459,683                   | 136,304,895            | 135,254,076      | 0.9568                            | 0.9494                          |
| ChrB1 | 205,241,052                   | 196,811,928            | 195,144,805      | 0.9589                            | 0.9508                          |
| ChrB2 | 154,261,789                   | 147,133,649            | 145,873,840      | 0.9538                            | 0.9456                          |
| ChrB3 | 148,491,654                   | 141,273,585            | 140,046,675      | 0.9514                            | 0.9431                          |
| ChrB4 | 144,259,557                   | 137,335,845            | 136,184,096      | 0.9520                            | 0.9440                          |
| ChrC1 | 221,441,202                   | 213,110,793            | 211,477,448      | 0.9624                            | 0.9550                          |
| ChrC2 | 157,659,299                   | 151,017,716            | 149,831,156      | 0.9579                            | 0.9503                          |
| ChrD1 | 116,869,131                   | 110,726,288            | 109,793,732      | 0.9474                            | 0.9395                          |
| ChrD2 | 89,822,065                    | 84,566,967             | 83,896,584       | 0.9415                            | 0.9340                          |
| ChrD3 | 95,741,729                    | 90,320,473             | 89,604,304       | 0.9434                            | 0.9359                          |
| ChrD4 | 96,020,406                    | 90,589,512             | 89,856,654       | 0.9434                            | 0.9358                          |
| ChrE1 | 63,002,102                    | 58,128,433             | 57,624,952       | 0.9226                            | 0.9147                          |
| ChrE2 | 64,039,838                    | 59,012,562             | 58,491,914       | 0.9215                            | 0.9134                          |
| ChrE3 | 43,024,555                    | 38,842,709             | 38,516,971       | 0.9028                            | 0.8952                          |
| ChrF1 | 68,669,167                    | 66,702,383             | 66,165,940       | 0.9714                            | 0.9635                          |
| ChrF2 | 82,763,536                    | 80,822,390             | 80,204,363       | 0.9765                            | 0.9691                          |
| ChrX  | 126,427,096                   | 115,457,488            | 113,206,614      | 0.9132                            | 0.8954                          |
| Avg.  | -                             | -                      | -                | 0.9473                            | 0.9391                          |

**Supplementary Table S13: Statistics regarding mapping of Asiatic lion raw reads to the Asiatic lion scaffolds**

| <b>Total reads</b> | <b>Mapped reads</b> | <b>% of mapped reads</b> | <b>Properly mapped reads</b> | <b>Unmapped</b> | <b>Coverage</b> |
|--------------------|---------------------|--------------------------|------------------------------|-----------------|-----------------|
| 1,588,787,434      | 1,535,593,778       | 96.65                    | 1,386,737,899                | 53,196,656      | 55.5            |

**Supplementary Table S14: Variation Statistics regarding mapping of lion reads to the Asiatic lion scaffolds**

|               | <b>Homozygous</b> | <b>Heterozygous</b> | <b>Total</b> |
|---------------|-------------------|---------------------|--------------|
| <b>SNVs</b>   | 221,397           | 22,790              | 244,187      |
| <b>INDELs</b> | 39,860            | 15,727              | 55,587       |
| <b>Total</b>  | 261,257           | 38,517              | 299,774      |



**Supplementary Table S15: Variation Statistics regarding mapping of Asiatic lion reads to the domestic cat genome (*Felis\_catus-8.0*)**

|               | <b>Homozygous</b> | <b>Heterozygous</b> | <b>Total</b> |
|---------------|-------------------|---------------------|--------------|
| <b>SNV s</b>  | 41,532,416        | 745,184             | 42,277,600   |
| <b>INDELs</b> | 6,980,946         | 533,005             | 7,513,951    |
| <b>Total</b>  | 48,513,362        | 1,278,189           | 49,791,551   |

**Supplementary Table S16: Statistics of Asiatic lion draft chromosomes**

|              | <b>Total bases</b> | <b>Number of A, C, G, T</b> | <b>Number of N</b> | <b>Number of scaffolds</b> | <b>Avg. length of scaffolds</b> | <b>Max. length of scaffold</b> | <b>Min. length of scaffold</b> |
|--------------|--------------------|-----------------------------|--------------------|----------------------------|---------------------------------|--------------------------------|--------------------------------|
| <b>ChrA1</b> | 212,374,592        | 204,199,597                 | 8,174,995          | 11,557                     | 21,207                          | 205,056                        | 88                             |
| <b>ChrA2</b> | 149,495,056        | 142,948,854                 | 6,546,202          | 8,353                      | 20,595                          | 262,985                        | 78                             |
| <b>ChrA3</b> | 125,695,176        | 120,729,876                 | 4,965,300          | 6,677                      | 21,790                          | 267,142                        | 85                             |
| <b>ChrB1</b> | 178,427,797        | 170,735,598                 | 7,692,199          | 10,218                     | 20,111                          | 201,034                        | 54                             |
| <b>ChrB2</b> | 134,423,980        | 128,830,742                 | 5,593,238          | 7,594                      | 20,499                          | 195,532                        | 96                             |
| <b>ChrB3</b> | 129,299,323        | 123,734,213                 | 5,565,110          | 7,306                      | 20,576                          | 214,589                        | 96                             |
| <b>ChrB4</b> | 126,213,181        | 120,752,019                 | 5,461,162          | 7,155                      | 20,432                          | 246,013                        | 65                             |
| <b>ChrC1</b> | 197,424,461        | 189,172,046                 | 8,252,415          | 10,734                     | 21,100                          | 229,378                        | 71                             |
| <b>ChrC2</b> | 138,521,516        | 132,845,619                 | 5,675,897          | 7,633                      | 20,855                          | 383,982                        | 93                             |
| <b>ChrD1</b> | 103,188,731        | 98,421,593                  | 4,767,138          | 6,080                      | 19,370                          | 216,203                        | 96                             |
| <b>ChrD2</b> | 78,837,955         | 75,633,457                  | 3,204,498          | 4,186                      | 21,755                          | 214,418                        | 103                            |
| <b>ChrD3</b> | 83,982,566         | 80,474,991                  | 3,507,575          | 4,549                      | 21,445                          | 233,055                        | 90                             |
| <b>ChrD4</b> | 83,215,589         | 79,456,265                  | 3,759,324          | 4,669                      | 20,667                          | 240,205                        | 72                             |
| <b>ChrE1</b> | 52,862,329         | 49,744,235                  | 3,118,094          | 3,170                      | 19,613                          | 205,393                        | 61                             |
| <b>ChrE2</b> | 54,133,435         | 51,299,689                  | 2,833,746          | 3,085                      | 20,502                          | 209,317                        | 60                             |
| <b>ChrE3</b> | 35,050,219         | 33,302,104                  | 1,748,115          | 2,050                      | 19,899                          | 207,721                        | 95                             |
| <b>ChrF1</b> | 60,922,062         | 58,301,526                  | 2,620,536          | 3,638                      | 19,441                          | 170,669                        | 64                             |
| <b>ChrF2</b> | 74,891,923         | 72,135,184                  | 2,756,739          | 4,074                      | 21,133                          | 205,397                        | 92                             |
| <b>ChrX</b>  | 100,701,347        | 87,036,620                  | 13664727           | 9,463                      | 11,917                          | 146,549                        | 111                            |
| <b>Total</b> | 2,119,701,455      | 2,019,782,242               | 99,919,213         | 122,195                    | -                               | -                              | -                              |

**Supplementary Table S17: Summary of non-coding RNA in Asiatic lion genome:**

| Type         |                                       | Copy number | Average length (bp) | Total length (bp) | % of genome |
|--------------|---------------------------------------|-------------|---------------------|-------------------|-------------|
| <b>miRNA</b> |                                       | 1010        | 74                  | 75,377            | 0.00305     |
| <b>tRNA</b>  |                                       | 413         | 74                  | 30,562            | 0.00123     |
| <b>rRNA</b>  | 5S                                    | 234         | 112                 | 26,200            | 0.00106     |
|              | 5.8S                                  | 4           | 153                 | 613               | 0.00002     |
|              | 18S rRNA                              | 75          | 895                 | 67,141            | 0.00271     |
|              | 28S rRNA                              | 37          | 1,084               | 40,110            | 0.00162     |
| <b>snRNA</b> | snRNA total, spliceosomal RNA, CD-box | 2,284       | 134                 | 3,07,887          | 0.01246     |

**Supplementary Table S18: Statistics of predicted protein-coding genes in Asiatic lion as compared to other genomes using various models**

|                       | <b>Gene set</b> | <b>Number</b> | <b>Average transcript length (bp)</b> | <b>Average CDS length (bp)</b> | <b>Average no. of exons per gene</b> | <b>Average exons length (bp)</b> | <b>Average intron length</b> |
|-----------------------|-----------------|---------------|---------------------------------------|--------------------------------|--------------------------------------|----------------------------------|------------------------------|
| <b><i>De novo</i></b> | <b>AUGUSTUS</b> | 19,086        | 23,860                                | 1,097                          | 7                                    | 161                              | 3,287                        |
|                       | <b>Cat</b>      | 19,945        | 10,786                                | 1,240                          | 7                                    | 190                              | 1,724                        |
|                       | <b>Tiger</b>    | 18,943        | 10,871                                | 1,196                          | 6                                    | 186                              | 1,780                        |
| <b>Homology</b>       | <b>Dog</b>      | 20,362        | 11,337                                | 1,264                          | 7                                    | 187                              | 1,749                        |
|                       | <b>Human</b>    | 28,873        | 11,720                                | 1,210                          | 7                                    | 175                              | 1,777                        |
|                       | <b>Mouse</b>    | 23,613        | 11,356                                | 1,224                          | 7                                    | 180                              | 1,742                        |
| <b>EST</b>            |                 | 719           | 1,391                                 | 512                            | 3                                    | 177                              | 465                          |
| <b>EVM</b>            |                 | 20,543        | 13,818                                | 1,083                          | 7                                    | 162                              | 2,391                        |

**Supplementary Table S19: Statistics of predicted protein-coding genes in Asiatic lion as compared to other genomes: Evidence from EVM gene models**

|                  |              | ≥ 20% overlap |         | ≥ 50% overlap |         | ≥ 80% overlap |         |
|------------------|--------------|---------------|---------|---------------|---------|---------------|---------|
|                  |              | Number        | Percent | Number        | Percent | Number        | Percent |
| <b>Augustus</b>  |              | 17,980        | 87.52   | 16,798        | 81.77   | 14,173        | 68.99   |
|                  | <b>Cat</b>   | 8,186         | 39.85   | 3,402         | 16.56   | 1,503         | 7.32    |
|                  | <b>Tiger</b> | 7,903         | 38.47   | 3,222         | 15.68   | 1,408         | 6.85    |
| <b>Exonerate</b> | <b>Dog</b>   | 7,503         | 36.52   | 2,995         | 14.58   | 1,300         | 6.33    |
|                  | <b>Human</b> | 7,656         | 37.27   | 2,918         | 14.20   | 1,190         | 5.79    |
|                  | <b>Mouse</b> | 6,962         | 33.89   | 2,694         | 13.11   | 1,136         | 5.53    |
| <b>EST</b>       |              | 167           | 0.81    | 80            | 0.39    | 37            | 0.18    |

**Supplementary Table 20: Number of genes in Asiatic lion annotated for homology or functional classification by CANoPI**

|                    |           | <b>Number</b> | <b>Percent</b> |
|--------------------|-----------|---------------|----------------|
| <b>Total</b>       |           | 20,543        | -              |
| <b>Annotated</b>   | InterPro  | 19,316        | 94.03          |
|                    | GO        | 17,277        | 84.10          |
|                    | KEGG      | 4,543         | 22.11          |
|                    | SwissProt | 178           | 0.87           |
|                    | TrEMBL    | 19,825        | 96.50          |
| <b>Unannotated</b> |           | 540           | 2.63           |

**Supplementary Table S21: Statistical analysis of orthologous protein families in Asiatic lion using PFam**

| <b>Species</b>      | <b>Single copy orthologs</b> | <b>Co-orthologs</b> | <b>Unique paralogs</b> | <b>Other orthologs</b> | <b>Un-clustered</b> | <b>Total</b>  |
|---------------------|------------------------------|---------------------|------------------------|------------------------|---------------------|---------------|
| <b>Asiatic lion</b> | <b>6,295</b>                 | <b>4</b>            | <b>21</b>              | <b>8,024</b>           | <b>6,199</b>        | <b>20,543</b> |
| Cat                 | 9,447                        | 59                  | 100                    | 22,654                 | 960                 | 33,220        |
| Amur tiger          | 8,806                        | 41                  | 110                    | 20,516                 | 0                   | 29,473        |
| Human               | 9,591                        | 1,621               | 4,768                  | 82,150                 | 0                   | 98,130        |
| Mouse               | 9,755                        | 1,357               | 4,001                  | 61,028                 | 0                   | 76,141        |
| Dog                 | 5,846                        | 163                 | 311                    | 40,767                 | 0                   | 47,087        |
| Panda               | 13,810                       | 472                 | 694                    | 17,531                 | 0                   | 32,507        |
| Opossum             | 10,672                       | 1,378               | 4,218                  | 32,844                 | 0                   | 49,112        |

**Supplementary Table S22: Functional classification of Felidae-specific protein families**

| <b>Database*</b> | <b>Description</b>                            | <b>GO term</b> | <b>Number of genes</b> |
|------------------|-----------------------------------------------|----------------|------------------------|
| BP               | Cellular component organization or biogenesis | GO:0071840     | 8                      |
|                  | Cellular process                              | GO:0009987     | 24                     |
|                  | Localization                                  | GO:0051179     | 6                      |
|                  | Reproduction                                  | GO:0000003     | 1                      |
|                  | Biological regulation                         | GO:0065007     | 6                      |
|                  | Response to stimulus                          | GO:0050896     | 4                      |
|                  | Developmental process                         | GO:0032502     | 2                      |
|                  | Multicellular organismal process              | GO:0032501     | 1                      |
|                  | Biological adhesion                           | GO:0022610     | 1                      |
|                  | Metabolic process                             | GO:0008152     | 24                     |
|                  | Immune system process                         | GO:0002376     | 4                      |
| MF               | Binding                                       | GO:0005488     | 18                     |
|                  | Receptor activity                             | GO:0004872     | 1                      |
|                  | Structural molecule activity                  | GO:0005198     | 3                      |
|                  | Catalytic activity                            | GO:0003824     | 14                     |
|                  | Transporter activity                          | GO:0005215     | 4                      |
| CC               | Membrane                                      | GO:0016020     | 1                      |
|                  | Macromolecular complex                        | GO:0032991     | 8                      |
|                  | Cell part                                     | GO:0044464     | 17                     |
|                  | Organelle                                     | GO:0043226     | 11                     |
|                  | Extracellular region                          | GO:0005576     | 3                      |

**\*BP: Biological Process, MF: Molecular Function, CC: Cellular Components**



**Supplementary Table S23: PANTHER pathway analysis of Felidae-specific protein families**

| <b>PANTHER Pathway</b>                                            | <b>Total Components</b> | <b>Felidae Genes</b> |
|-------------------------------------------------------------------|-------------------------|----------------------|
| BMP/activin signaling pathway-drosophila                          | 37                      | 1                    |
| JAK/STAT signaling pathway                                        | 19                      | 2                    |
| B cell activation                                                 | 36                      | 1                    |
| Interleukin signaling pathway                                     | 21                      | 2                    |
| Interferon-gamma signaling pathway                                | 3                       | 1                    |
| Inflammation mediated by chemokine and cytokine signaling pathway | 28                      | 1                    |
| Asparagine and aspartate biosynthesis                             | 8                       | 1                    |
| T cell activation                                                 | 18                      | 1                    |
| TGF-beta signaling pathway                                        | 36                      | 1                    |
| SCW signaling pathway                                             | 45                      | 1                    |
| PDGF signaling pathway                                            | 20                      | 1                    |
| EGF receptor signaling pathway                                    | 19                      | 1                    |
| DPP signaling pathway                                             | 58                      | 1                    |
| DPP-SCW signaling pathway                                         | 10                      | 1                    |

**Supplementary Table S24: Gene Ontology ID, GO terms and InterPro IDs of Felidae-specific protein families**

| <b>PFAM ID</b> | <b>InterPro ID</b> | <b>TYPE</b> | <b>GO Term</b>                                                                                                         |
|----------------|--------------------|-------------|------------------------------------------------------------------------------------------------------------------------|
| PF00174.17     | IPR000572          | Domain      | Nitrate assimilation                                                                                                   |
| PF00190.20     | IPR006045          | Domain      | Nutrient reservoir activity                                                                                            |
| PF00363.16     | IPR001588          | Family      | Transporter activity, transport, extracellular region                                                                  |
| PF00665.24     | IPR001584          | Domain      | DNA Integration                                                                                                        |
| PF00714.15     | IPR002069          | Family      | Interferon-gamma receptor binding, immune response, extracellular region                                               |
| PF01958.16     | IPR002811          | Domain      | Oxidoreductase activity, NADP catabolic process, pyridine nucleotide biosynthetic process, oxidation-reduction process |
| PF02093.14     | IPR003036          | Domain      | Virion assembly                                                                                                        |
| PF02545.12     | IPR003697          | Family      | Cytoplasm                                                                                                              |
| PF02765.15     | IPR011564          | Domain      | DNA binding, telomere maintenance, nuclear chromosome                                                                  |
| PF03404.14     | IPR005066          | Domain      | Oxidoreductase activity, molybdenum ion binding, oxidation-reduction process                                           |
| PF04030.12     | IPR007173          | Domain      | D-arabinono-1,4-lactone oxidase activity, oxidation-reduction process, membrane                                        |
| PF04420.12     | IPR028945          | Family      | Tail-anchored membrane protein insertion into ER membrane                                                              |
| PF05669.10     | IPR008831          | Family      | RNA polymerase II transcription cofactor activity, regulation of transcription DNA-templated, mediator complex         |
| PF05808.9      | IPR008783          | Family      | Integral component of membrane                                                                                         |
| PF06214.9      | IPR010407          | Domain      | Receptor activity, lymphocyte activation, cell surface, integral component of membrane                                 |
| PF07855.10     | IPR012445          | Family      | Autophagy                                                                                                              |
| PF07994.10     | IPR002587          | Family      | Inositol-3-phosphate synthase activity, inositol biosynthetic process, phospholipid biosynthetic process               |
| PF08451.9      | IPR013659          | Domain      | Extracellular space                                                                                                    |
| PF09236.8      | IPR015317          | Family      | Hemoglobin binding, protein folding, erythrocyte differentiation, protein                                              |

|           |           |        |                                                                                                                                         |
|-----------|-----------|--------|-----------------------------------------------------------------------------------------------------------------------------------------|
|           |           |        | stabilization                                                                                                                           |
| PF09252.8 | IPR015332 | Family | Extracellular space                                                                                                                     |
| PF09412.8 | IPR018998 | Family | Hydrolase activity acting on ester bonds                                                                                                |
| PF10204.7 | IPR018469 | Family | Protein transport, endoplasmic reticulum membrane, integral component of membrane                                                       |
| PF10461.7 | IPR019502 | Family | Apoptotic process, cellular response to DNA damage stimulus                                                                             |
| PF10471.7 | IPR018860 | Family | Regulation of mitotic metaphase/anaphase transition, anaphase-promoting complex-dependent catabolic process, anaphase-promoting complex |
| PF12567.6 | IPR016335 | Family | Protein tyrosine phosphatase activity, T cell receptor signaling pathway                                                                |
| PF12632.5 | IPR026859 | Domain | Myosin binding                                                                                                                          |
| PF13096.4 | IPR027801 | Family | CENP-A containing nucleosome assembly, chromosome, centromeric region                                                                   |
| PF15077.4 | IPR027816 | Family | DNA binding                                                                                                                             |
| PF15307.4 | IPR029301 | Family | Acrosomal vesicle                                                                                                                       |
| PF15510.4 | IPR028847 | Family | DNA binding, mitotic nuclear division, kinetochore assembly                                                                             |
| PF15549.4 | IPR029096 | Family | Methylated histone binding                                                                                                              |
| PF15677.3 | IPR020162 | Family | Cerebellum development, neuron differentiation                                                                                          |
| PF15703.3 | IPR031428 | Family | Immune response-regulating signaling pathway, B cell activation                                                                         |
| PF15718.3 | IPR031447 | Family | Centriole replication                                                                                                                   |

**Supplementary Table S25: Gene Ontology terms and InterPro IDs of Asiatic lion-specific protein families**

| <b>InterPro</b> | <b>TYPE</b> | <b>GO term</b>                                                                                   |
|-----------------|-------------|--------------------------------------------------------------------------------------------------|
| IPR015872       | Domain      | Transcription initiation from RNA polymerase II promoter, transcription factor TFIIA complex     |
| IPR015871       | Domain      | Transcription initiation from RNA polymerase II promoter, transcription factor TFIIA complex     |
| IPR004850       | Domain      | Laminin binding, G-protein coupled acetylcholine receptor signaling pathway, receptor clustering |
| IPR005106       | Domain      | Oxidoreductase activity, NADP binding, oxidation-reduction process                               |
| IPR005314       | Family      | Peptidase activity, proteolysis, nucleus                                                         |
| IPR007747       | Family      | Nucleus                                                                                          |
| IPR009395       | Family      | BLOC-1 complex                                                                                   |
| IPR013221       | Domain      | ATP binding, biosynthetic process                                                                |
| IPR028067       | Family      | Immune response                                                                                  |

**Supplementary Table S26: Protein-families that underwent expansion in Asiatic lions**

| <b>Protein family</b> | <b>InterPro ID</b> | <b>GO ID Description</b>                                                                                                                     | <b>KEGG ID Description</b>                                                                   |
|-----------------------|--------------------|----------------------------------------------------------------------------------------------------------------------------------------------|----------------------------------------------------------------------------------------------|
| AICARFT_IMPC<br>Has   | IPR002695          |                                                                                                                                              | KO0230Purine metabolism;<br>KO0670one carbon pool by<br>folate                               |
| Aquarius_N            | IPR032174          | 0005681 Spliceosomal complex; 0000398mRNA<br>splicing, via spliceosome                                                                       | KO12874Genetic<br>information processing                                                     |
| CDO_I                 | IPR010300          | 0017172cysteine dioxygenase activity; 0005506iron<br>ion binding, 0055114oxidation-reduction<br>process;0046439 L-cysteine metabolic process | KO0270Cysteine and<br>methionine metabolism;<br>KO0430 taurine and<br>hypotaurine metabolism |
| CLP_protease          | IPR001907          |                                                                                                                                              | KO04112cell cycle;<br>KO04212longevity<br>regulating pathway                                 |
| Cys_rich_FGFR         | IPR001893          | 0016020                                                                                                                                      |                                                                                              |
| DNA_pol_phi           | IPR007015          | 0003887DNA-directed DNA polymerase activity;<br>0003677DNA binding;0006351DNA templated<br>transcription                                     | KO02331                                                                                      |
| DRIM                  | IPR011430          |                                                                                                                                              | KO14772ribosome<br>biogenesis                                                                |
| DUF2046               | IPR019152          |                                                                                                                                              | KO05200Pathways in<br>cancer, KO05216thyroid<br>cancer                                       |
| eIF3g                 | IPR024675          |                                                                                                                                              | KO03013RNA transport                                                                         |
| eIF-3_zeta            | IPR007783          | 0005852Eukaryotic translation initiation factor 3<br>complex; 0005737cytoplasm; 0003743translation<br>initiation factor activity             | KO03013RNA transport                                                                         |
| Gaa1                  | IPR007246          | 0042765GPI-anchor transamidase complex;<br>0016021integral component of membrane                                                             | KO00563Glycosylphosphati<br>dylinositol (GPI)-anchor                                         |

|                     |           |                                                                                                                                                                                                                                                                   |                                                                                                                                 |
|---------------------|-----------|-------------------------------------------------------------------------------------------------------------------------------------------------------------------------------------------------------------------------------------------------------------------|---------------------------------------------------------------------------------------------------------------------------------|
|                     |           |                                                                                                                                                                                                                                                                   | biosynthesis                                                                                                                    |
| Lyase_aromatic      | IPR001106 |                                                                                                                                                                                                                                                                   | KO00340Histidine metabolism                                                                                                     |
| NUC202              | IPR012980 |                                                                                                                                                                                                                                                                   | KO03009ribosome biogenesis                                                                                                      |
| OSTMP1              | IPR019172 |                                                                                                                                                                                                                                                                   |                                                                                                                                 |
| PRP1_N              | IPR010491 | 0005634 Nucleus, 0000398mRNA splicing, via spliceosome                                                                                                                                                                                                            | KO03040Spliceosome                                                                                                              |
| Ribosomal_L23e<br>N | IPR005633 |                                                                                                                                                                                                                                                                   | KO03010Ribosome                                                                                                                 |
| Ribosomal_S26e      | IPR000892 | 0005840Ribosome; 0005622intracellular; 0003735 Structural constituents of ribosome; 0006412 Translation                                                                                                                                                           | KO03010Ribosome                                                                                                                 |
| SBP_bac_3           | IPR001638 |                                                                                                                                                                                                                                                                   | KO02030                                                                                                                         |
| SKIP_SNW            | IPR004015 | 0005681spliceosomal complex; 0000398mRNA splicing, via spliceosome                                                                                                                                                                                                | KO03040Spliceosome; KO04330notch signalling pathway; KO05169epstein-barr virus infection; KO05203viral carcinogenesis           |
| SRP68               | IPR026258 | 0005786 Signal Recognition Particle, endoplasmic reticulum targeting;0030942 endoplasmic reticulum signal peptide binding;0005047 signal recognition particle binding; 00083127S RNA binding; 0006614SRP dependent co-translational protein targeting to membrane | KO03060Protein export                                                                                                           |
| TIM                 | IPR000652 | 0004807triose phosphate isomerase activity; 0008152metabolic process                                                                                                                                                                                              | KO00010glycolysis/gluconeogenesis; KO00051fructose and mannose metabolism; KO00562 inositol phosphate metabolism; KO00710carbon |

|                    |           |                                                                     |                                                |
|--------------------|-----------|---------------------------------------------------------------------|------------------------------------------------|
|                    |           |                                                                     | metabolism; KO01200amino acid biosynthesis     |
| TMA7               | IPR015157 |                                                                     |                                                |
| U5_2-<br>snRNA_bdg | IPR019581 | 0030623U5 snRNA binding                                             | KO03040Spliceosome                             |
| WT1                | IPR000976 | 0005634 Nucleus; 0006355 Regulation of transcription, DNA templated | KO05202Transcriptional misregulation in cancer |

**Supplementary Table S27: PANTHER pathway analysis of protein families expanded in Asiatic lions**

| <b>PANTHER Pathway</b>                            | <b>Pathway ID</b> | <b>Total Components</b> | <b>Asiatic Lion Genes</b> | <b>Fold over-represented</b> | <b>p-value</b> |
|---------------------------------------------------|-------------------|-------------------------|---------------------------|------------------------------|----------------|
| Ionotropic glutamate receptor pathway             | PTHR18966:SF269   | 29                      | 1                         | 36.68                        | 0              |
| De novo purine biosynthesis                       | PTHR11692:SF3     | 23                      | 1                         | 26.90                        | 0              |
| Metabotropic glutamate receptor group III pathway | PTHR18966:SF269   | 12                      | 1                         | 16.47                        | 0              |
| Glycolysis                                        | PTHR21139:SF12    | 10                      | 1                         | 12.23                        | 0              |



**Supplementary Table S28: PANTHER Pathway analysis of PSGs in Asiatic lions**

| <b>PANTHER Pathway</b>                                              | <b>Lion PSGs</b> | <b>PANTHER family/subfamily</b>                                                                               |
|---------------------------------------------------------------------|------------------|---------------------------------------------------------------------------------------------------------------|
| Vitamin B6 metabolism, Threonine biosynthesis                       | THNSL2           | Threonine synthase-like 2                                                                                     |
| Nicotine degradation                                                | UGT1A1           | UDP-glucuronosyltransferase 1-1-related                                                                       |
| Adrenaline and noradrenaline biosynthesis                           | SLC6A16          | Orphan sodium- and chloride-dependent neurotransmitter transporter NTT5                                       |
| Ubiquitin proteasome pathway                                        | UBA7             | Ubiquitin-like modifier-activating enzyme 7                                                                   |
| PDGF signaling pathway                                              | ARHGAP9          | Rho GTPase-activating protein 9                                                                               |
| Ras Pathway                                                         | RGL1             | Ral guanine nucleotide dissociation stimulator-like 1                                                         |
| Cadherin signaling pathway                                          | PTPN1            | Tyrosine-protein phosphatase non-receptor type 1                                                              |
| Heme biosynthesis                                                   | Coq2             | 4-hydroxybenzoate polyprenyltransferase, mitochondrial                                                        |
| Huntington disease                                                  | OPTN             | Optineurin                                                                                                    |
| p53 pathway                                                         | Fas              | Tumor Necrosis Factor Receptor superfamily member 6                                                           |
| Gq and Go alpha mediated heterotrimeric G-protein signaling pathway | RGS10            | Regulator of g-protein signaling 10                                                                           |
| General transcription by RNA polymerase I                           | TBPL2            | TATA box-binding protein-like protein 2                                                                       |
| Apoptosis signaling pathway                                         | Fas, CASP10      | Tumor Necrosis Factor Receptor superfamily member 6, Caspase recruitment domain-containing protein 18-related |
| Inflammation mediated by chemokine                                  | ITGAL,           | Integrin alpha-I,                                                                                             |

|                                                                     |                      |                                                                                                                              |
|---------------------------------------------------------------------|----------------------|------------------------------------------------------------------------------------------------------------------------------|
| and cytokine signaling pathway                                      | ALOX5AP              | Arachidonate 5-lipoxygenase-activating protein                                                                               |
| Gi and Gs alpha mediated heterotrimeric G-protein signaling pathway | CREB3, RGS10         | Cyclic AMP-responsive element-binding protein 3, Regulator of G-protein signaling 10                                         |
| FAS signaling pathway                                               | Fas, CASP10          | Tumor Necrosis Factor Receptor superfamily member 6, Caspase recruitment domain-containing protein 18-related                |
| Integrin signaling pathway                                          | ITGAL, COL9A2, Itgad | Integrin alpha-L, Collagen alpha-2 (IX) chain, Integrin alpha-D                                                              |
| Transcription regulation by bZIP transcription factor               | TTF2, TBPL2, CREB3   | Transcription termination factor 2, TATA box-binding protein-like protein 2, Cyclic AMP-responsive element-binding protein 3 |
| T cell activation                                                   | Cd3d, CD3E, CD3G     | T-cell surface glycoprotein cd3 delta chain, epsilon chain, gamma chain                                                      |

**Supplementary Table S29: Rates of heterozygous SNVs among published felid genomes**

| <b>Species</b>      | <b>Number of heterozygous SNVs</b> | <b>Rate of heterozygous SNVs</b> | <b>References</b>   |
|---------------------|------------------------------------|----------------------------------|---------------------|
| <b>Asiatic lion</b> | <b>745,184</b>                     | <b>0.000276</b>                  | <b>This study</b>   |
| African lion        | 1,934,590                          | 0.000717                         | Kim et al. 2016     |
| White lion          | 1,630,777                          | 0.000604                         | “                   |
| Bengal tiger        | 2,410,975                          | 0.000893                         | “                   |
| Amur tiger          | 2,703,974                          | 0.001001                         | “                   |
| White tiger         | 2,249,985                          | 0.000833                         | “                   |
| Amur leopard        | 1,222,100                          | 0.000453                         | “                   |
| Snow leopard        | 1,117,356                          | 0.000414                         | “                   |
| Leopard Cat         | 5,625,748                          | 0.002084                         | “                   |
| Cheetah             | 1,145,005                          | 0.000424                         | “                   |
| Eurasian lynx       | -                                  | 0.000276                         | Abascal et al. 2016 |
| Iberian lynx        | -                                  | 0.000102                         | “                   |

**Supplementary Table S30: Male-specific genes\* or genes found to be one-fold enriched in three male Asiatic lion transcriptomes.**

| <b>Lion gene</b>                      | <b>PPDE**</b> | <b>PostFC***</b> | <b>RealFC****</b> | <b>UniProt ID</b> | <b>Protein/<br/>Gene name</b>                                               | <b>GO [GO ID]</b>                                                                                                                                                                                                                                                                 | <b>Protein<br/>family</b> |
|---------------------------------------|---------------|------------------|-------------------|-------------------|-----------------------------------------------------------------------------|-----------------------------------------------------------------------------------------------------------------------------------------------------------------------------------------------------------------------------------------------------------------------------------|---------------------------|
| <b>scaffold42437_<br/>size21949.1</b> | 1             | 175.51           | 13002.75          | K9KBN2            | ATP-<br>dependent<br>RNA<br>helicase<br>DDX3Y-like<br>protein<br>(Fragment) | ATP binding [GO:0005524];<br>helicase activity<br>[GO:0004386]; nucleic acid<br>binding [GO:0003676]                                                                                                                                                                              | DEAD<br>box               |
| <b>scaffold59869_<br/>size15355.1</b> | 1             | 127.61           | 9472.39           | A0A0G2YAU5        | USP9Y                                                                       | thiol-dependent ubiquitinyl<br>hydrolase activity<br>[GO:0036459]; protein<br>deubiquitination<br>[GO:0016579]; ubiquitin-<br>dependent protein catabolic<br>process [GO:0006511]                                                                                                 | Peptidase                 |
| <b>scaffold21300_<br/>size35976.1</b> | 1             | 103.58           | 316.08            | F6RKG6            | ZFX                                                                         | nucleus [GO:0005634];<br>metal ion binding<br>[GO:0046872]; RNA<br>polymerase II regulatory<br>region sequence-specific<br>DNA binding [GO:0000977];<br>transcription factor activity,<br>sequence-specific DNA<br>binding [GO:0003700];<br>multicellular organism<br>development | NA                        |

|                                  |         |        |         |            |         |                                                                                                                                                                                                                                                                                               |    |
|----------------------------------|---------|--------|---------|------------|---------|-----------------------------------------------------------------------------------------------------------------------------------------------------------------------------------------------------------------------------------------------------------------------------------------------|----|
|                                  |         |        |         |            |         | [GO:0007275]; regulation of transcription, DNA-templated [GO:0006355]                                                                                                                                                                                                                         |    |
| <b>scaffold38865_size23674.1</b> | 1       | 100.08 | 7381.71 | W8CEP0     | EIF2S3Y | GTP binding [GO:0005525]; GTPase activity [GO:0003924]                                                                                                                                                                                                                                        | NA |
| <b>scaffold34789_size25890.1</b> | 0.99999 | 50.41  | 3686.02 | A0A0G2YFY4 | KDM5D   | nucleus [GO:0005634]; DNA binding [GO:0003677]; oxidoreductase activity, acting on paired donors, with incorporation or reduction of molecular oxygen, 2-oxoglutarate as one donor, and incorporation of one atom each of oxygen into both donors [GO:0016706]; zinc ion binding [GO:0008270] | NA |

**\*Genes with a minimum value of 2 in PostFC,**

**\*\*PPDE = posterior probability that a gene/transcript is differentially expressed;**

**\*\*\*PostFC = posterior fold change for a gene/transcript;**

**\*\*\*\*RealFC = real fold change for a gene/transcript**
